# Supplementary material for: Analysis of Microbial Community Diversity on the Epidermis of Wine Grapes in Manasi’s Vineyard, Xinjiang
Source: MDPI journal article supplement (doi:10.3390/foods11203174), 2022-10-12
Supplement: s1 [file s1]

# Catalog

|                                                                                                                 |   |
|-----------------------------------------------------------------------------------------------------------------|---|
| Supplementary Table.....                                                                                        | 1 |
| Table S1. Richness and diversity indices of fungal and bacterial communities among different grape samples..... | 1 |
| Supplementary figures .....                                                                                     | 1 |
| Figure S1. Assessment of sparse curves for fungal sequencing saturation. ....                                   | 1 |
| Figure S2. Assessment of sparse curves for bacterial sequencing saturation.....                                 | 2 |
| Figure S3. Alpha diversity indices for fungal communities.....                                                  | 3 |
| Figure S4. Alpha diversity indices for bacterial communities. ....                                              | 4 |
| Figure S5. Statistics of the microbiota at each classification level for fungi (a) and bacteria (b)...          | 5 |

## Supplementary Table

**Table S1.** Richness and diversity indices of fungal and bacterial communities among different grape samples.

| Samples | Fungi                     |                           |                        |                        | Bacteria                  |                           |                        |                        |
|---------|---------------------------|---------------------------|------------------------|------------------------|---------------------------|---------------------------|------------------------|------------------------|
|         | Chao1                     | Observed species          | Shannon                | Simpson                | Chao1                     | Observed species          | Shannon                | Simpson                |
| R-CS    | 129.30±8.32 <sup>c</sup>  | 128.00±15.23 <sup>c</sup> | 2.01±0.14 <sup>b</sup> | 0.54±0.13 <sup>b</sup> | 263.98±18.42 <sup>f</sup> | 143.76±13.25 <sup>c</sup> | 4.84±0.07 <sup>d</sup> | 0.91±0.11 <sup>c</sup> |
| R-SR    | 135.24±10.12 <sup>b</sup> | 133.60±14.20 <sup>b</sup> | 1.73±0.02 <sup>c</sup> | 0.54±0.11 <sup>b</sup> | 393.88±14.23 <sup>e</sup> | 216.33±10.20 <sup>b</sup> | 5.90±0.03 <sup>c</sup> | 0.95±0.23 <sup>b</sup> |
| R-PN    | 129.60±16.22 <sup>c</sup> | 128.12±8.32 <sup>c</sup>  | 1.65±0.11 <sup>c</sup> | 0.52±0.06 <sup>b</sup> | 740.47±12.74 <sup>b</sup> | 343.36±12.20 <sup>a</sup> | 6.69±0.02 <sup>b</sup> | 0.95±0.09 <sup>b</sup> |
| R-ML    | 168.66±17.62 <sup>a</sup> | 168.03±16.23 <sup>a</sup> | 2.75±0.12 <sup>a</sup> | 0.74±0.15 <sup>a</sup> | 420.47±15.44 <sup>d</sup> | 225.12±12.63 <sup>b</sup> | 5.88±0.01 <sup>c</sup> | 0.94±0.08 <sup>b</sup> |
| R-MS    | 164.76±15.63 <sup>a</sup> | 162.41±15.32 <sup>a</sup> | 2.17±0.11 <sup>b</sup> | 0.54±0.01 <sup>b</sup> | 950.94±15.23 <sup>a</sup> | 398.41±10.36 <sup>a</sup> | 7.26±1.23 <sup>a</sup> | 0.97±0.08 <sup>a</sup> |
| W-CB    | 128.60±14.23 <sup>c</sup> | 126.66±14.20 <sup>c</sup> | 1.89±0.02 <sup>c</sup> | 0.45±0.03 <sup>c</sup> | 448.42±9.56 <sup>d</sup>  | 280.86±11.45 <sup>b</sup> | 7.09±0.42 <sup>a</sup> | 0.98±0.07 <sup>a</sup> |
| W-IR    | 102.69±18.63 <sup>d</sup> | 101.61±12.32 <sup>d</sup> | 2.67±0.04 <sup>a</sup> | 0.71±0.13 <sup>a</sup> | 543.37±6.32 <sup>c</sup>  | 321.13±6.50 <sup>a</sup>  | 7.20±0.12 <sup>a</sup> | 0.98±0.04 <sup>a</sup> |
| W-EL    | 81.10±7.64 <sup>f</sup>   | 80.73±10.32 <sup>e</sup>  | 1.37±0.21 <sup>d</sup> | 0.33±0.08 <sup>d</sup> | 316.99±7.23 <sup>c</sup>  | 194.26±13.98 <sup>c</sup> | 5.14±0.36 <sup>c</sup> | 0.85±0.09 <sup>d</sup> |
| W-RS    | 91.23±9.82 <sup>e</sup>   | 90.46±14.23 <sup>f</sup>  | 1.43±0.14 <sup>d</sup> | 0.48±0.09 <sup>c</sup> | 275.77±6.23 <sup>f</sup>  | 169.03±2.35 <sup>c</sup>  | 5.14±0.41 <sup>c</sup> | 0.91±0.01 <sup>c</sup> |

Different superscripts indicate significant differences between samples ( $p < 0.05$ , Duncan's test).

## Supplementary figures

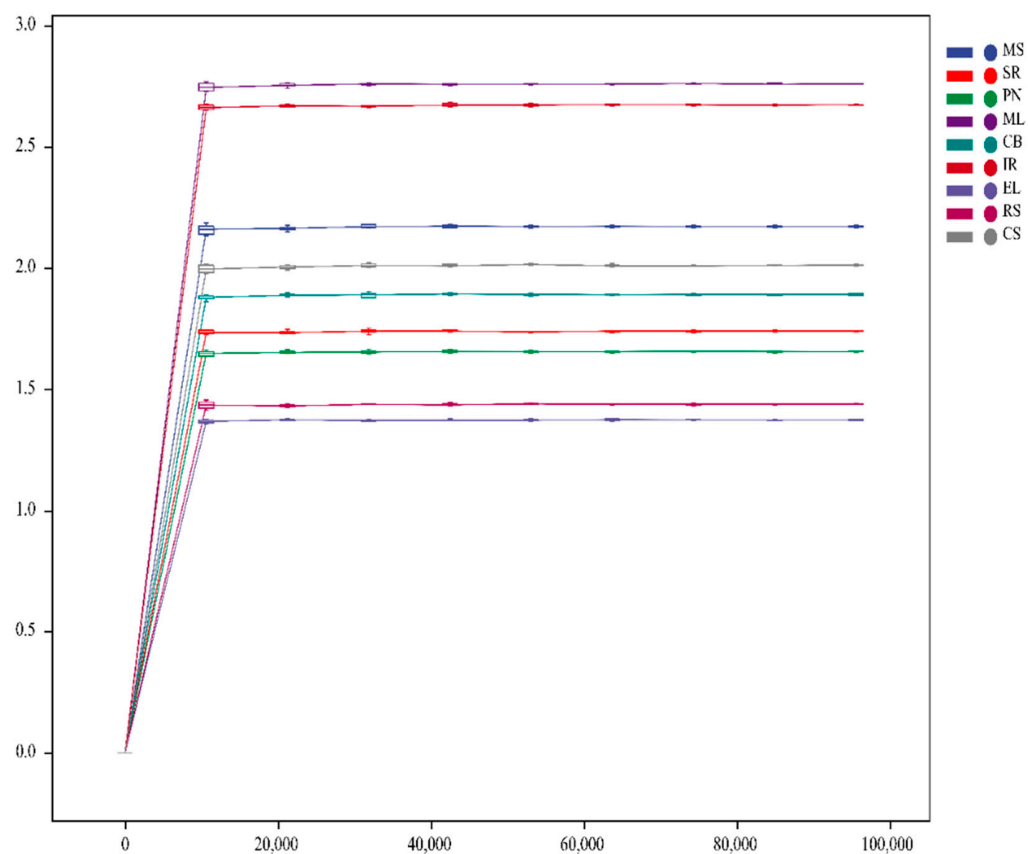

**Figure S1.** Assessment of sparse curves for fungal sequencing saturation.

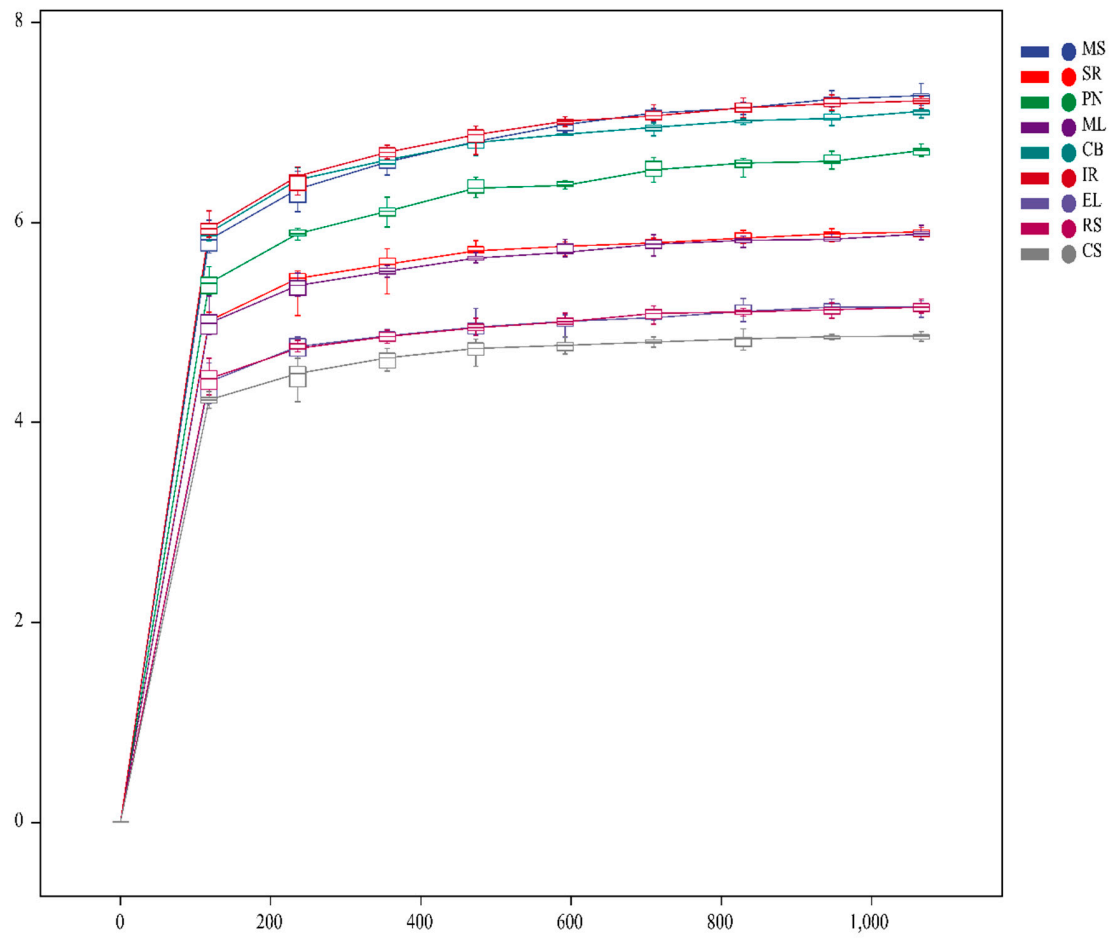

**Figure S2.** Assessment of sparse curves for bacterial sequencing saturation.

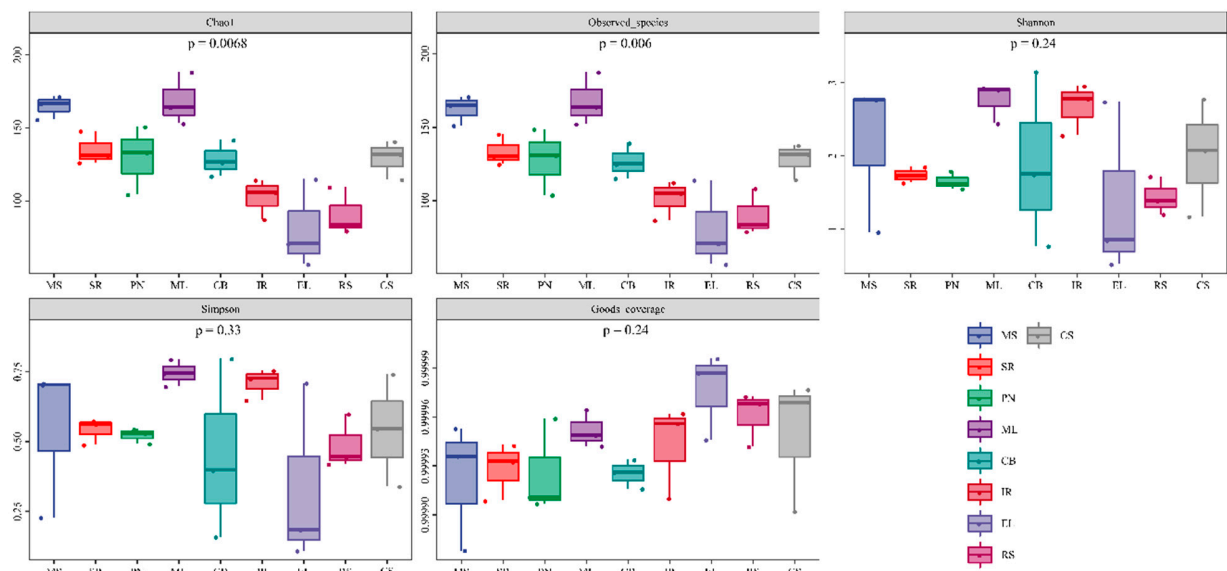

**Figure S3.** Alpha diversity indices for fungal communities.

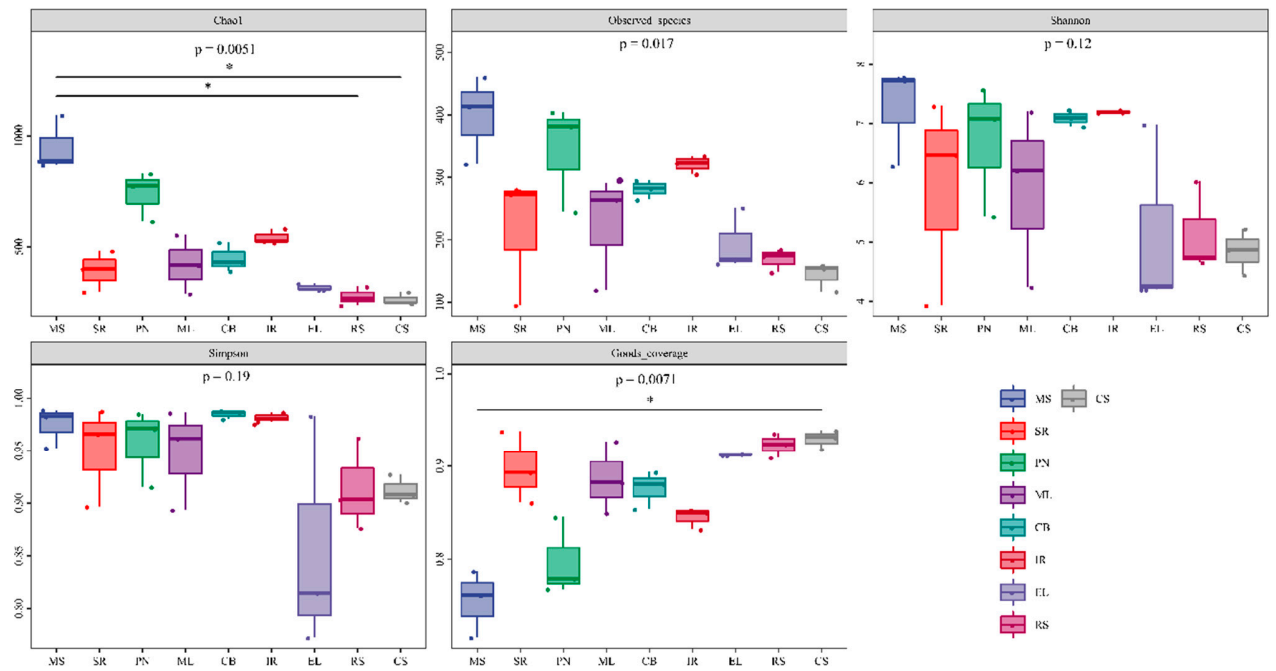

**Figure S4.** Alpha diversity indices for bacterial communities.

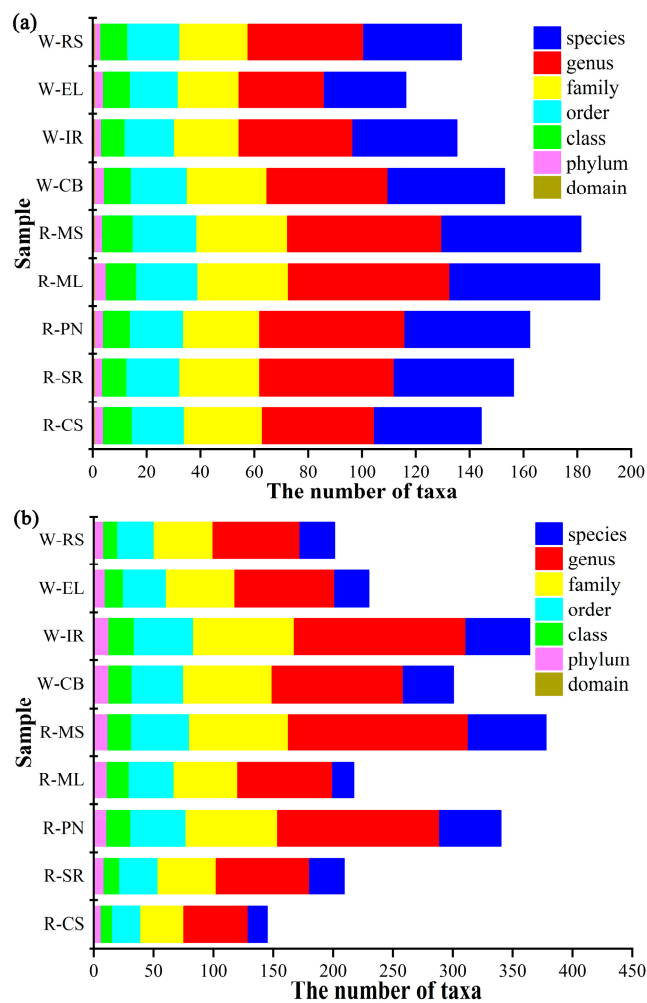

**Figure S5.** Statistics of the microbiota at each classification level for fungi (a) and bacteria (b).
